# Supplementary material for: Limbic Hyperactivity in Response to Emotionally Neutral Stimuli in Schizophrenia: A Neuroimaging Meta-Analysis of the Hypervigilant Mind
Source: Atypon-hosted journal article supplement (doi:10.1176/appi.ajp.2019.19030247), 2019-09-06
Supplement: appi.ajp.2019.19030247.ds001.pdf [file appi.ajp.2019.19030247.ds001.pdf]

 


Psychiatry Online
