# Supplementary material for: Limbic Hyperactivity in Response to Emotionally Neutral Stimuli in Schizophrenia: A Neuroimaging Meta-Analysis of the Hypervigilant Mind
Source: Atypon-hosted journal article supplement (doi:10.1176/appi.ajp.2019.19030247), 2019-09-06
Supplement: appi.ajp.2019.19030247.ds001.pdf [file appi.ajp.2019.19030247.ds001.pdf]

**TABLE S1. PRISMA CHECKLIST**

| Section/topic             | # | Checklist item                                                                                                                                                                                                                                                                                              | Reported on page # |
|---------------------------|---|-------------------------------------------------------------------------------------------------------------------------------------------------------------------------------------------------------------------------------------------------------------------------------------------------------------|--------------------|
| <b>TITLE</b>              |   |                                                                                                                                                                                                                                                                                                             |                    |
| Title                     | 1 | Identify the report as a systematic review, meta-analysis, or both.                                                                                                                                                                                                                                         | 1                  |
| <b>ABSTRACT</b>           |   |                                                                                                                                                                                                                                                                                                             |                    |
| Structured summary        | 2 | Provide a structured summary including, as applicable: background; objectives; data sources; study eligibility criteria, participants, and interventions; study appraisal and synthesis methods; results; limitations; conclusions and implications of key findings; systematic review registration number. | 2                  |
| <b>INTRODUCTION</b>       |   |                                                                                                                                                                                                                                                                                                             |                    |
| Rationale                 | 3 | Describe the rationale for the review in the context of what is already known.                                                                                                                                                                                                                              | 3-6                |
| Objectives                | 4 | Provide an explicit statement of questions being addressed with reference to participants, interventions, comparisons, outcomes, and study design (PICOS).                                                                                                                                                  | 5-6                |
| <b>METHODS</b>            |   |                                                                                                                                                                                                                                                                                                             |                    |
| Protocol and registration | 5 | Indicate if a review protocol exists, if and where it can be accessed (e.g., Web address), and, if available, provide registration information including registration number.                                                                                                                               | NA                 |
| Eligibility criteria      | 6 | Specify study characteristics (e.g., PICOS, length of follow-up) and report characteristics (e.g., years considered, language, publication status) used as criteria for eligibility, giving rationale.                                                                                                      | 6                  |
| Information sources       | 7 | Describe all information sources (e.g., databases with dates of coverage, contact with study authors to identify additional studies) in the search and date last searched.                                                                                                                                  | 6                  |
| Search                    | 8 | Present full electronic search strategy for at least one database, including any limits used, such that it could be repeated.                                                                                                                                                                               | 6                  |

*(Continued)*

| Section/topic                      | #  | Checklist item                                                                                                                                                                                                         | Reported on page #       |
|------------------------------------|----|------------------------------------------------------------------------------------------------------------------------------------------------------------------------------------------------------------------------|--------------------------|
| Study selection                    | 9  | State the process for selecting studies (i.e., screening, eligibility, included in systematic review, and, if applicable, included in the meta-analysis).                                                              | 6                        |
| Data collection process            | 10 | Describe method of data extraction from reports (e.g., piloted forms, independently, in duplicate) and any processes for obtaining and confirming data from investigators.                                             | 6                        |
| Data items                         | 11 | List and define all variables for which data were sought (e.g., PICOS, funding sources) and any assumptions and simplifications made.                                                                                  | 7                        |
| Risk of bias in individual studies | 12 | Describe methods used for assessing risk of bias of individual studies (including specification of whether this was done at the study or outcome level), and how this information is to be used in any data synthesis. | 7-8                      |
| Summary measures                   | 13 | State the principal summary measures (e.g., risk ratio, difference in means).                                                                                                                                          | 7-8                      |
| Synthesis of results               | 14 | Describe the methods of handling data and combining results of studies, if done, including measures of consistency (e.g., $I^2$ ) for each meta-analysis.                                                              | 7-8                      |
| Risk of bias across studies        | 15 | Specify any assessment of risk of bias that may affect the cumulative evidence (e.g., publication bias, selective reporting within studies).                                                                           | 7-8                      |
| Additional analyses                | 16 | Describe methods of additional analyses (e.g., sensitivity or subgroup analyses, meta-regression), if done, indicating which were pre-specified.                                                                       | 7-8                      |
| <b>RESULTS</b>                     |    |                                                                                                                                                                                                                        |                          |
| Study selection                    | 17 | Give numbers of studies screened, assessed for eligibility, and included in the review, with reasons for exclusions at each stage, ideally with a flow diagram.                                                        | 7-8-9                    |
| Study characteristics              | 18 | For each study, present characteristics for which data were extracted (e.g., study size, PICOS, follow-up period) and provide the citations.                                                                           | 8                        |
| Risk of bias within studies        | 19 | Present data on risk of bias of each study and, if available, any outcome level assessment (see item 12).                                                                                                              | NA                       |
| Results of individual studies      | 20 | For all outcomes considered (benefits or harms), present, for each study: (a) simple summary data for each intervention group (b) effect estimates and confidence intervals, ideally with a forest plot.               | 8                        |
| Synthesis of results               | 21 | Present results of each meta-analysis done, including confidence intervals and measures of consistency.                                                                                                                | 8-11 Supp T2 to T6       |
| Risk of bias across studies        | 22 | Present results of any assessment of risk of bias across studies (see Item 15).                                                                                                                                        | 8-11, Supp T2 to Supp T6 |

(Continued)

| Section/topic       | #  | Checklist item                                                                                                                                                                       | Reported on page #  |
|---------------------|----|--------------------------------------------------------------------------------------------------------------------------------------------------------------------------------------|---------------------|
| Additional analysis | 23 | Give results of additional analyses, if done (e.g., sensitivity or subgroup analyses, meta-regression [see Item 16]).                                                                | 8-111 Supp T2 to T6 |
| <b>DISCUSSION</b>   |    |                                                                                                                                                                                      |                     |
| Summary of evidence | 24 | Summarize the main findings including the strength of evidence for each main outcome; consider their relevance to key groups (e.g., healthcare providers, users, and policy makers). | 12-15               |
| Limitations         | 25 | Discuss limitations at study and outcome level (e.g., risk of bias), and at review-level (e.g., incomplete retrieval of identified research, reporting bias).                        | 15                  |
| Conclusions         | 26 | Provide a general interpretation of the results in the context of other evidence, and implications for future research.                                                              | 16                  |
| <b>FUNDING</b>      |    |                                                                                                                                                                                      |                     |
| Funding             | 27 | Describe sources of funding for the systematic review and other support (e.g., supply of data); role of funders for the systematic review.                                           | NA                  |

From: Moher D, Liberati A, Tetzlaff J, Altman DG, The PRISMA Group (2009). Preferred Reporting Items for Systematic Reviews and Meta-Analyses: The PRISMA Statement. PLoS Med 6(7): e1000097. doi:10.1371/journal.pmed1000097. For more information, visit: [www.prisma-statement.org](http://www.prisma-statement.org).

**TABLE S2.** Description of the studies included in the meta-analysis (n = 23)

| <b>First Author, Date</b>    | <b>n=</b> | <b>HC (n=)</b> | <b>TR (ms)</b> | <b>Explicit/Implicit</b> | <b>Facial expressions</b> | <b>Stimuli type</b>                                                        | <b>Task indications</b>                              | <b>Contrast selected (1st-level)</b>                    |
|------------------------------|-----------|----------------|----------------|--------------------------|---------------------------|----------------------------------------------------------------------------|------------------------------------------------------|---------------------------------------------------------|
| <b>Dowd, 2010 (18)</b>       | 40        | 32             | 3000           | Explicit                 | No                        | Emotional pictures, words and faces                                        | Arousal and Valence Ratings                          | Neutral > Baseline                                      |
| <b>Ferri, 2014 (25)</b>      | 22        | 22             | 2400           | Implicit                 | No                        | Dynamic stimuli of human emotion-action                                    | Passive observation                                  | Neutral Action & Emotion > Intertrial fixation Baseline |
| <b>Habel, 2010 (26)</b>      | 17        | 17             | 3000           | Explicit                 | Yes                       | Emotional recognition (fear, happiness, anger or sadness)                  | Selecting target emotion or non-target/neutral face) | Neutral face > baseline condition (blank screen)        |
| <b>Hall, 2008 (12)</b>       | 19        | 24             | 2500           | Implicit                 | Yes                       | Facial expression (fear and neutral)                                       | Gender identification                                | Neutral > Baseline (fixation cross)                     |
| <b>Holt, 2006 (16)</b>       | 15        | 16             | 2800           | Implicit                 | Yes                       | Facial expression (happy, fearful, neutral faces)                          | Passive observation                                  | Neutral > Baseline (visual crosshair)                   |
| <b>Jensen, 2008 (27)</b>     | 13        | 13             | 2240           | Implicit                 | No                        | Classical passive Pavlovian learning paradigm (Aversive acoustic stimulus) | Passive hearing                                      | Unconditioned Stimulus (Colored circles) only           |
| <b>Lakis, 2013 (28)</b>      | 27        | 37             | 3000           | Implicit                 | No                        | Positive, Negative and Neutral Pictures                                    | Passive observation                                  | Neutral > Rest                                          |
| <b>Lee, 2014 (29)</b>        | 15        | 14             | 2000           | Explicit                 | No                        | Positive, Negative and Neutral Pictures (IAPS)                             | Subjective emotional rating                          | Neutral > Null events (crosshair fixation)              |
| <b>Mier, 2010 (30)</b>       | 16        | 16             | 3000           | Implicit                 | Yes                       | Neutral Task (Statement + Neutral Face)                                    | Physical feature detection                           | Neutral Task > Baseline (fixation cross)                |
| <b>Modinos, 2015 (17)</b>    | 18        | 22             | 3000           | Explicit                 | No                        | Emotional pictures (IAPS: Positive, Negative, Neutral)                     | Emotional Arousal Ratings                            | Neutral > Baseline (Fixation cross)                     |
| <b>Mothersill, 2014 (31)</b> | 25        | 21             | 2200           | Implicit                 | Yes                       | Dynamic facial emotional expression (Angry, Neutral)                       | Passive observation                                  | Neutral > Baseline (dynamic circles)                    |

*(Continued)*

| <b>First Author, Date</b>    | <b>n=</b> | <b>HC (n=)</b> | <b>TR (ms)</b> | <b>Explicit/Implicit</b> | <b>Facial expressions</b> | <b>Stimuli type</b>                                                | <b>Task indications</b>                                  | <b>Contrast selected (1st-level)</b>                                                        |
|------------------------------|-----------|----------------|----------------|--------------------------|---------------------------|--------------------------------------------------------------------|----------------------------------------------------------|---------------------------------------------------------------------------------------------|
| <b>Pankow, 2013 (32)</b>     | 35        | 36             | 2300           | Implicit                 | No                        | Emotional pictures (IAPS: Positive, Negative, Neutral)             | Active viewing (i.e. confirming each viewed picture)     | Neutral > Baseline (overall mean)                                                           |
| <b>Rauch, 2010 (33)</b>      | 12        | 12             | 3000           | Explicit                 | Yes                       | Facial stimuli (sad, happy, neutral, erased face)                  | Valence ratings                                          | Neutral > Erased face                                                                       |
| <b>Reske, 2009 (34)</b>      | 18        | 18             | 3000           | Explicit                 | Yes                       | Facial expressions (happy, sad, neutral)                           | Emotional recognition matching verbal categories         | Neutral > Baseline                                                                          |
| <b>Shin, 2015 (35)</b>       | 16        | 16             | 2000           | Implicit                 | Yes                       | Facial emotional expression (fearful, happy, neutral)              | Gender identification                                    | Neutral > baseline (fixation cross)                                                         |
| <b>Spilka, 2015 (36)</b>     | 28        | 27             | 2500           | Implicit                 | Yes                       | Facial expressions (happy, sad, angry, neutral or scrambled faces) | Passive observation                                      | Neutral > Scrambled faces                                                                   |
| <b>Surguladze, 2006 (37)</b> | 15        | 11             | 2000           | Implicit                 | Yes                       | Facial expression (sad, happy, neutral)                            | Gender identification                                    | Neutral > Baseline (fixation cross)                                                         |
| <b>Suslow, 2013 (38)</b>     | 30        | 35             | 2000           | Explicit                 | Yes                       | Facial expressions (Angry, Happy, Neutral)                         | Emotional Valence Ratings                                | Neutral > Baseline (Erased Face)                                                            |
| <b>Taylor, 2002 (39)</b>     | 14        | 13             | NA             | Explicit                 | No                        | Emotional pictures (aversives, non-aversives)                      | Arousal Ratings                                          | Non-aversive > Baseline (Blank screen with fixation cross)                                  |
| <b>Taylor, 2007 (40)</b>     | 23        | 15             | 2000           | Explicit                 | No                        | Emotional pictures (IAPS: Positive, Aversives, Neutral)            | Arousal and Valence Ratings                              | Neutral > Baseline (Blank images of a colored polygon on a textured, gray-toned background) |
| <b>Taylor, 2011 (41)</b>     | 21        | 21             | 2000           | Implicit                 | Yes                       | Facial emotional expression (happy, fearful, sad, neutral)         | Gender identification and preference indication (yes/no) | Neutral > Baseline (fixation cross)                                                         |

*(Continued)*

| <b>First Author, Date</b> | <b>n=</b> | <b>HC (n=)</b> | <b>TR (ms)</b> | <b>Explicit/Implicit</b> | <b>Facial expressions</b> | <b>Stimuli type</b>                                      | <b>Task indications</b>     | <b>Contrast selected (1st-level)</b> |
|---------------------------|-----------|----------------|----------------|--------------------------|---------------------------|----------------------------------------------------------|-----------------------------|--------------------------------------|
| <b>Ursu, 2011 (42)</b>    | 20        | 20             | 2500           | Explicit                 | No                        | Affective pictures (IAPS: pleasant, unpleasant, neutral) | Valence and Arousal ratings | Neutral > Baseline (fixation cross)  |
| <b>Whalley, 2009 (43)</b> | 15        | 14             | 2500           | Explicit                 | No                        | Affective scenes (IAPS: Positive, Neutral)               | Arousal Ratings             | Neutral > Baseline (Fixation cross)  |

*Note.* HC = Healthy Controls; WB = Whole Brain; ROI = Region of Interest; CPZ = Chlorpromazine equivalents; FWHM = Full Width at Half Maximum kernel size. Positive Psychotic Symptoms refer to the Positive subscale score of the PANSS.

**TABLE S3.** Brain responses to emotionally neutral stimuli in individuals with schizophrenia versus healthy controls: Jackknife analyses (n=23)

|                                         | Increased activations (SZ > HC)    |                                   | Decreased activation (HC > SZ)                |
|-----------------------------------------|------------------------------------|-----------------------------------|-----------------------------------------------|
|                                         | <b>L Putamen</b><br>(-28, -6, -12) | <b>R Amygdala</b><br>(32, 0, -24) | <b>R Middle Frontal Gyrus</b><br>(48, 16, 34) |
| <b>Jackknife analysis</b>               |                                    |                                   |                                               |
| All studies but <i>Dowd, 2010</i>       | Yes                                | Yes                               | Yes                                           |
| All studies but <i>Ferri, 2014</i>      | Yes                                | Yes                               | <b>No</b>                                     |
| All studies but <i>Habel, 2010</i>      | Yes                                | Yes                               | Yes                                           |
| All studies but <i>Hall, 2008</i>       | Yes                                | Yes                               | Yes                                           |
| All studies but <i>Holt, 2006</i>       | Yes                                | Yes                               | Yes                                           |
| All studies but <i>Jensen, 2008</i>     | Yes                                | Yes                               | Yes                                           |
| All studies but <i>Lakis, 2013</i>      | Yes                                | Yes                               | Yes                                           |
| All studies but <i>Lee, 2014</i>        | Yes                                | Yes                               | Yes                                           |
| All studies but <i>Mier, 2010</i>       | Yes                                | Yes                               | Yes                                           |
| All studies but <i>Modinos, 2015</i>    | Yes                                | Yes                               | Yes                                           |
| All studies but <i>Mothersill, 2014</i> | Yes                                | Yes                               | Yes                                           |
| All studies but <i>Pankow, 2013</i>     | Yes                                | Yes                               | Yes                                           |
| All studies but <i>Rauch, 2010</i>      | Yes                                | Yes                               | Yes                                           |
| All studies but <i>Reske, 2009</i>      | Yes                                | Yes                               | Yes                                           |
| All studies but <i>Shin, 2015</i>       | Yes                                | Yes                               | Yes                                           |
| All studies but <i>Spilka, 2015</i>     | Yes                                | Yes                               | Yes                                           |
| All studies but <i>Surguladze, 2006</i> | Yes                                | Yes                               | Yes                                           |
| All studies but <i>Suslow, 2013</i>     | Yes                                | Yes                               | Yes                                           |
| All studies but <i>Taylor, 2002</i>     | Yes                                | Yes                               | Yes                                           |
| All studies but <i>Taylor, 2007</i>     | Yes                                | Yes                               | Yes                                           |
| All studies but <i>Taylor, 2011</i>     | Yes                                | Yes                               | Yes                                           |
| All studies but <i>Ursu, 2011</i>       | Yes                                | Yes                               | <b>No</b>                                     |
| All studies but <i>Whalley, 2009</i>    | Yes                                | Yes                               | Yes                                           |
|                                         | 23 out of<br>23 studies            | 23 out of<br>23 studies           | 21 out of<br>23 studies                       |

**TABLE S4.** Brain responses to emotionally neutral stimuli in individuals with schizophrenia versus healthy controls: whole-brain studies (n=14)

| Main Peaks                   | <i>MNI</i><br>Coordinates | <i>SDM</i><br>z-value <sup>(a)</sup> | <i>P</i> Value <sup>(b)</sup> | No. of<br>voxels <sup>(c)</sup> | Breakdown (No. of voxels) <sup>(c)</sup>                                                                              |
|------------------------------|---------------------------|--------------------------------------|-------------------------------|---------------------------------|-----------------------------------------------------------------------------------------------------------------------|
| <u>Increased activations</u> |                           |                                      |                               |                                 |                                                                                                                       |
| L Putamen                    | -30, 2, -2                | 1.52                                 | 0.000005                      | 1338                            | L Insula (346)<br>L Putamen (279)<br>L Hippocampus (87)<br>L Amygdala (22)                                            |
| R Putamen                    | 32,2,2                    | 1.34                                 | 0.0001                        | 924                             | R Putamen (379)<br>R Insula (215)                                                                                     |
| L Postcentral gyrus          | -46, -12, 34              | 1.05                                 | 0.0012                        | 212                             | L Postcentral (145)<br>L Precentral (11)                                                                              |
| <u>Decreased activations</u> |                           |                                      |                               |                                 |                                                                                                                       |
| R Middle Frontal Gyrus       | 48, 20, 38                | -1.33                                | 0.0002                        | 360                             | R Middle Frontal Gyrus (83)<br>R Inferior frontal gyrus, opercular (215)<br>R Inferior frontal gyrus, triangular (62) |
| R Fusiform gyrus             | 36,-70,-10                | -1.15                                | 0.0006                        | 300                             | R Fusiform gyrus (110)<br>R Inferior occipital gyrus (34)                                                             |

*Note.* L = Left; R = Right.

(a) Voxel probability threshold:  $p = 0.005$

(b) Peak height threshold:  $z = 1$

(c) Cluster extent threshold: 100 voxels. Regions with less than 10 voxels are not reported in the cluster breakdown.



**TABLE S5.** Brain responses to emotionally neutral stimuli in individuals with schizophrenia versus healthy controls: studies studies using region of interest (n=9)

| Main Peaks                   | <i>MNI</i><br>Coordinates | SDM<br>z-value <sup>(a)</sup> | <i>P</i> Value <sup>(b)</sup> | No. of<br>voxels <sup>(c)</sup> | Breakdown (No. of voxels) <sup>(c)</sup>                                                 |
|------------------------------|---------------------------|-------------------------------|-------------------------------|---------------------------------|------------------------------------------------------------------------------------------|
| <u>Increased activations</u> |                           |                               |                               |                                 |                                                                                          |
| R Amygdala                   | 34, 0, -22                | 1.65                          | 0.0004                        | 636                             | R Amygdala (89)<br>R Superior Temporal Gyrus (123)<br>R Parahippocampal gyrus (158)      |
| R Middle Temporal Gyrus      | 56, -56, 20               | 1.65                          | 0.0004                        | 424                             | R Middle Temporal Gyrus (178)<br>R Angular Gyrus (145)<br>R Superior Temporal Gyrus (66) |
| L Parahippocampal gyrus      | -24, 8, -24               | 1.59                          | 0.0006                        | 269                             | L Parahippocampal gyrus (27)<br>L Superior Temporal Gyrus (49)<br>L Insula (11)          |
| <u>Decreased activations</u> |                           |                               |                               |                                 |                                                                                          |
| R Precentral gyrus           | 44, -2, 46                | -1.22                         | 0.0005                        | 363                             | R Precentral gyrus (205)<br>R Postcentral gyrus (105)                                    |

*Note.* L = Left; R = Right

(a) Voxel probability threshold:  $p = 0.005$

(b) Peak height threshold:  $z = 1$

(c) Cluster extent threshold: 100 voxels. Regions with less than 10 voxels are not reported in the cluster breakdown.

**TABLE S6.** Brain responses to emotionally neutral stimuli in individuals with schizophrenia versus healthy controls: studies using only facial expressions stimuli (n=12)

| Main Peaks                   | MNI Coordinates | SDM z-value <sup>(a)</sup> | P Value <sup>(b)</sup> | No. of voxels <sup>(c)</sup> | Breakdown (No. of voxels) <sup>(c)</sup>                                                                                                        |
|------------------------------|-----------------|----------------------------|------------------------|------------------------------|-------------------------------------------------------------------------------------------------------------------------------------------------|
| <u>Increased activations</u> |                 |                            |                        |                              |                                                                                                                                                 |
| L Putamen                    | -26, 4, -6      | 2.56                       | ~0                     | 2329                         | L Putamen (315)<br>L Insula (270)<br>L Hippocampus (207)<br>L Amygdala (186)<br>L Parahippocampal gyrus (106)<br>L Superior temporal gyrus (32) |
| R Putamen                    | 34, 4, 2        | 1.44                       | 0.0008                 | 381                          | R Putamen (247)<br>R Insula (65)                                                                                                                |
| <u>Decreased activations</u> |                 |                            |                        |                              |                                                                                                                                                 |
| L Lingual gyrus              | -18, -82, 0     | -1.06                      | 0.0002                 | 142                          | L lingual gyrus (87)                                                                                                                            |

*Note.* L = Left; R = Right

(a) Voxel probability threshold:  $p = 0.005$

(b) Peak height threshold:  $z = 1$

(c) Cluster extent threshold: 100 voxels. Regions with less than 10 voxels are not reported in the cluster breakdown.

**TABLE S7.** Brain responses to emotionally neutral stimuli in individuals with schizophrenia versus healthy controls: studies with other stimuli than facial expressions (i.e. scenes, pictures, words, auditory stimuli) (n=11)

| Main Peaks                               | <i>MNI</i><br>Coordinates | SDM<br>z-value <sup>(a)</sup> | <i>P</i> Value <sup>(b)</sup> | No. of voxels <sup>(c)</sup> | Breakdown (No. of voxels) <sup>(c)</sup>                                                                                                           |
|------------------------------------------|---------------------------|-------------------------------|-------------------------------|------------------------------|----------------------------------------------------------------------------------------------------------------------------------------------------|
| <u>Increased activations</u>             |                           |                               |                               |                              |                                                                                                                                                    |
| R Angular Gyrus                          | 54, -52, 24               | 1.13                          | 0.0006                        | 309                          | R Angular Gyrus (143)<br>R Superior Temporal Gyrus (67)<br>R Middle Temporal Gyrus (42)<br>R Supramarginal Gyrus (39)                              |
| R Amygdala                               | 32, 0, -26                | 1.06                          | 0.0009                        | 183                          | R. Amygdala (107)<br>R Superior Temporal Gyrus (37)                                                                                                |
| <u>Decreased activations</u>             |                           |                               |                               |                              |                                                                                                                                                    |
| R Inferior Frontal Gyrus opercular part. | 46, 10, 38                | -1.72                         | 0.00007                       | 1072                         | R Precentral gyrus (530)<br>R Inferior Frontal Gyrus, Opercular (287)<br>R Middle Frontal Gyrus (152)<br>R Inferior Frontal Gyrus, Triangular (42) |

Note. L = Left; R = Right

(a) Voxel probability threshold:  $p = 0.005$

(b) Peak height threshold:  $z = 1$

(c) Cluster extent threshold: 100 voxels. Regions with less than 10 voxels are not reported in the cluster breakdown.

**TABLE S8.** Brain responses to emotionally neutral stimuli in individuals with schizophrenia versus healthy controls: studies with an explicit emotional task (n=11)

| Main Peaks                   | <i>MNI</i><br>Coordinates | SDM<br>z-value <sup>(a)</sup> | <i>P</i> Value <sup>(b)</sup> | No. of voxels <sup>(c)</sup> | Breakdown (No. of voxels) <sup>(c)</sup>                                                    |
|------------------------------|---------------------------|-------------------------------|-------------------------------|------------------------------|---------------------------------------------------------------------------------------------|
| <u>Increased activations</u> |                           |                               |                               |                              |                                                                                             |
| L Putamen                    | -24, 4, -2                | 1.29                          | 0.00014                       | 601                          | L Putamen (439)<br>BA 48 (116)                                                              |
| <u>Decreased activations</u> |                           |                               |                               |                              |                                                                                             |
| R Fusiform Gyrus             | 36, -70, -10              | -1.29                         | 0.0003                        | 688                          | R Fusiform Gyrus (587)<br>R Inferior Occipital Gyrus (53)<br>R Inferior Temporal Gyrus (10) |

*Note.* L = Left; R = Right; BA = Brodmann Area

(a) Voxel probability threshold:  $p = 0.005$

(b) Peak height threshold:  $z = 1$

(c) Cluster extent threshold: 100 voxels. Regions with less than 10 voxels are not reported in the cluster breakdown.

**TABLE S9.** Brain responses to emotionally neutral stimuli in individuals with schizophrenia versus healthy controls: studies with an implicit emotional task (n=12)

| Main Peaks                   | <i>MNI</i><br>Coordinates | SDM<br>z-value <sup>(a)</sup> | <i>P</i> Value <sup>(b)</sup> | No. of voxels <sup>(c)</sup> | Breakdown (No. of voxels) <sup>(c)</sup>                                                                                    |
|------------------------------|---------------------------|-------------------------------|-------------------------------|------------------------------|-----------------------------------------------------------------------------------------------------------------------------|
| <u>Increased activations</u> |                           |                               |                               |                              |                                                                                                                             |
| R Uncus                      | 30, -2, -30               | 1.85                          | 0.00004                       | 1529                         | R Parahippocampal gyrus (354)<br>R Middle Temporal Gyrus (119)<br>R Amygdala (93)<br>R Fusiform (60)                        |
| L Amygdala                   | -24, -8, -16              | 2.33                          | ~0                            | 1181                         | L Amygdala (170)<br>L Hippocampus (332)<br>L Parahippocampal gyrus (76)                                                     |
| <u>Decreased activations</u> |                           |                               |                               |                              |                                                                                                                             |
| R Precentral gyrus           | 46, 4, 42                 | -1.32                         | 0.0003                        | 976                          | R Precentral gyrus (455)<br>R Inferior Frontal Gyrus, Opercular (192)<br>R Postcentral (196)<br>R Middle Frontal Gyrus (16) |

*Note.* L = Left; R = Right

(a) Voxel probability threshold:  $p = 0.005$

(b) Peak height threshold:  $z = 1$

(c) Cluster extent threshold: 100 voxels. Regions with less than 10 voxels are not reported in the cluster breakdown.

**TABLE S10.** Brain responses to emotionally neutral stimuli in individuals with schizophrenia versus healthy controls: studies a FWHM  $\leq$  8mm (n=17)

| Main Peaks                   | MNI Coordinates | SDM z-value <sup>(a)</sup> | P Value <sup>(b)</sup> | No. of voxels <sup>(c)</sup> | Breakdown (No. of voxels) <sup>(c)</sup>                                                                                                                                        |
|------------------------------|-----------------|----------------------------|------------------------|------------------------------|---------------------------------------------------------------------------------------------------------------------------------------------------------------------------------|
| <u>Increased activations</u> |                 |                            |                        |                              |                                                                                                                                                                                 |
| L Putamen                    | -26, 4, -10     | 1.75                       | ~0                     | 2068                         | L Putamen (269)<br>L Insula (175)<br>L Amygdala (182)<br>L Hippocampus (229)<br>L Parahippocampal gyrus (103)<br>L Olfactory cortex (34)<br>L Superior Temporal Gyrus (32)      |
| R Parahippocampal gyrus      | 32, 2, -26      | 1.11                       | 0.0007                 | 414                          | R Parahippocampal Gyrus (83)<br>R Amygdala (76)<br>R Superior temporal Gyrus (51)                                                                                               |
| <u>Decreased activations</u> |                 |                            |                        |                              |                                                                                                                                                                                 |
| R Middle Frontal Gyrus       | 48, 14, 32      | -1.47                      | 0.00002                | 1118                         | R Inferior Frontal Gyrus, Opercular (395)<br>R Precentral Gyrus (227)<br>R Postcentral Gyrus (147)<br>R Middle Frontal Gyrus (124)<br>R Inferior Frontal Gyrus, Triangular (85) |

Note. L = Left; R = Right

(a) Voxel probability threshold:  $p = 0.005$

(b) Peak height threshold:  $z = 1$

(c) Cluster extent threshold: 100 voxels. Regions with less than 10 voxels are not reported in the cluster breakdown.

**TABLE S11.** Description of the studies included in the meta-analysis: Emotionally Negative Stimuli versus Neutral (SZ versus HC) (n=16)

| Study                 | Contrasts                                | Studies with Significant results | Type of Stimuli | WB/ROI | Explicit/Implicit |
|-----------------------|------------------------------------------|----------------------------------|-----------------|--------|-------------------|
| Dowd, 2010 (18)       | Negative > Neutral                       | X                                | Others          | WB     | Explicit          |
| Hall, 2008 (12)       | Fear > Neutral                           | X                                | Faces           | ROI    | Implicit          |
| Holt, 2006 (16)       | Fearful > Neutral                        | -                                | Faces           | ROI    | Explicit          |
| Jensen, 2008 (27)     | CS+                                      | -                                | Others          | ROI    | Implicit          |
| Lakis, 2013 (28)      | Negative > Neutral                       | X                                | Others          | ROI    | Implicit          |
| Modinos, 2015 (17)    | Emotional scenes > Neutral               | -                                | Others          | WB     | Explicit          |
| Mothersill, 2014 (31) | Angry > Neutral                          | -                                | Faces           | WB     | Implicit          |
| Pankow, 2013 (32)     | Main effect: Negative > Positive+Neutral | X                                | Others          | WB     | Implicit          |
| Rauch, 2010 (33)      | Sad > Neutral                            | X                                | Faces           | ROI    | Explicit          |
| Reske, 2009 (34)      | Main effect: Sad > Happy+neutral         | X                                | Faces           | WB     | Explicit          |
| Spilka, 2015 (36)     | Fearful > Neutral                        | -                                | Faces           | WB     | Implicit          |
| Surguladze, 2006 (37) | Fearful > Neutral                        | -                                | Faces           | ROI    | Implicit          |
| Suslow, 2013 (38)     | Angry> initial phase                     | -                                | Faces           | ROI    | Explicit          |
| Taylor, 2002 (39)     | Aversive > Non-aversive                  | X                                | Others          | WB     | Explicit          |
| Taylor, 2007 (40)     | Aversive > Neutral                       | X                                | Others          | ROI    | Explicit          |
| Whalley, 2009 (41)    | Emotional scenes > Neutral               | X                                | Others          | ROI    | Explicit          |

Note. X = Significant Results reported; - = no peaks reported. WB = Whole Brain; ROI = Region-of-Interest
